# Supplementary material for: Podoplanin interaction with caveolin-1 promotes tumour cell migration and invasion
Source: bioRxiv or medRxiv preprint supplement (doi:10.1101/488304), 2018-12-06
Supplement: Supplementary file [file media-1.pdf]

## Supplementary Tables

**Supplementary Table S1:** Primers for cloning podoplanin variants. Template: Plasmid pCMV6-mPdpn-tGFP (Origene, ref. MG201468)

| Pdpn Variant | Primer | Sequence                                | Tm (°C) |
|--------------|--------|-----------------------------------------|---------|
| Delta_SP     | Fw     | ATGGGGACTATAGGCGTGAATGAAGATGA<br>TATTGT | 60.5    |
|              | Rv     | GGGCGAGAACCTTCCAGAAATCTTCTTC            | 61.4    |
| Delta_CT     | Fw     | ATGTGGACCGTGCCAGTGTGTTCTG               | 61.1    |
|              | Rv     | AACAACAATGAAGATCCCTCCGACGAAGC           | 61.5    |

**Supplementary Table S2:** Primers used for cloning of Caveolin-1. Template: cDNA created from mRNA extracted from B16.F10 cells

|      | Primer | Sequence                     | Tm (°C) |
|------|--------|------------------------------|---------|
| Cav1 | Fw     | ATGTCTGGGGGCAAATACGTAGACTCC  | 61.3    |
|      | Rv     | TATCTCTTTCTGCGTGCTGATGCGGATG | 61.4    |

**Supplementary Table S3:** Antibodies used for protein detection by western blot and immunofluorescence.

| Primary/Secondary antibody | Application        | Dilution | Supplier                   |
|----------------------------|--------------------|----------|----------------------------|
| Anti-Podoplanin            | WB                 | 1:1000   | R&D Systems (ref. BAF3244) |
| Anti-Podoplanin            | Immunofluorescence | 1:100    | R&D Systems (ref. BAF3244) |
| Anti-Caveolin-1            | WB                 | 1:500    | Abcam (ref. 2910)          |
| Anti-Caveolin-1            | Immunofluorescence | 1:100    | Abcam (ref. 2910)          |
| Anti-Rho                   | WB                 | 1:500    | Pierce (ref. 1862332)      |
| Anti-Rac 1                 | WB                 | 1:500    | Pierce (ref. 1862341)      |
| Anti-Cdc42                 | WB                 | 1:500    | Pierce (ref. 1862345)      |
| Anti-PAK1                  | WB                 | 1:500    | Cell Signaling (ref. 2602) |
| Anti-pPAK1                 | WB                 | 1:500    | Cell Signaling (ref. 9101) |
| Anti-pERK1/2               | WB                 | 1:500    | Cell Signaling (ref. 4370) |
| Anti-ERK1/2                | WB                 | 1:500    | Cell Signaling (ref. 9102) |
| Anti-Cdck5                 | WB                 | 1:500    | GeneTex (ref. GTX108328)   |
| Anti-Tubulin               | WB                 | 1:2000   | Sigma (ref. T6074)         |
| Anti-Goat HRP              | WB                 | 1:1000   | DakoCytomaton (ref. P0160) |
| Anti-Rabbit                | WB                 | 1:1000   | DakoCytomaton (ref. P0399) |
| Anti-Mouse                 | WB                 | 1:1000   | DakoCytomaton (ref. P0447) |

## Supplementary Figures

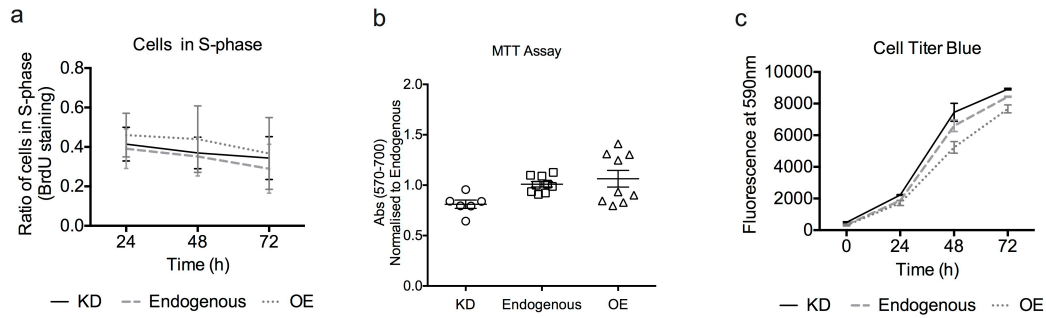

**Supplementary Figure S1:** a) BrdU proliferation assay for the cells with different podoplanin levels. Data from 2 independent experiments performed in triplicate. b) MTT metabolic assay for the cells with different podoplanin levels. Data from 3 independent experiments performed in triplicate. c) Cell titer blue viability assay for the cells with different podoplanin levels. Representative data from 3 independent experiments. Data presented as Mean  $\pm$  SEM.

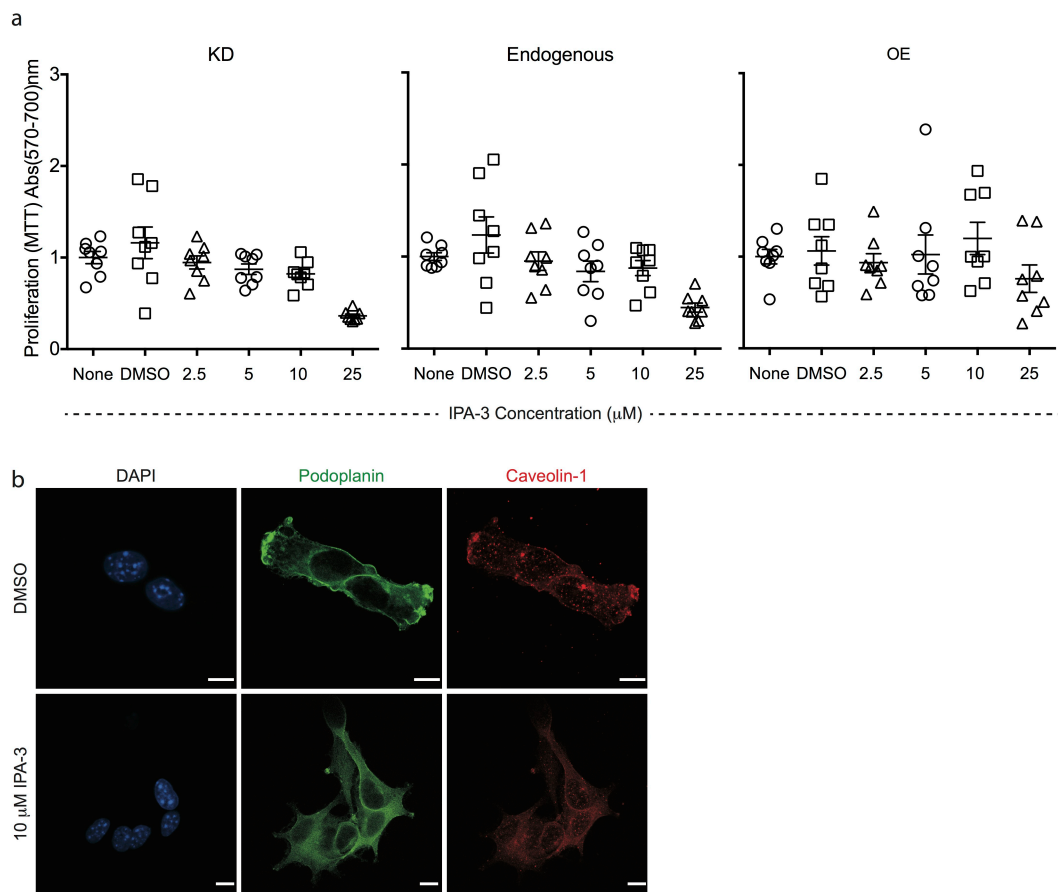

**Supplementary Figure S2:** a) Proliferation of cells with different levels of podoplanin levels in the presence of increasing concentrations of PAK1 inhibitor IPA-3. Higher concentrations

of IPA-3 impact the proliferative ability of cells (also measured with AnnexinV staining – data not shown). b) Immunofluorescence for podoplanin (green) and caveolin-1 (red) of cells treated with 10  $\mu$ m IPA-3 or DMSO control. Nuclei counterstained with DAPI (blue).

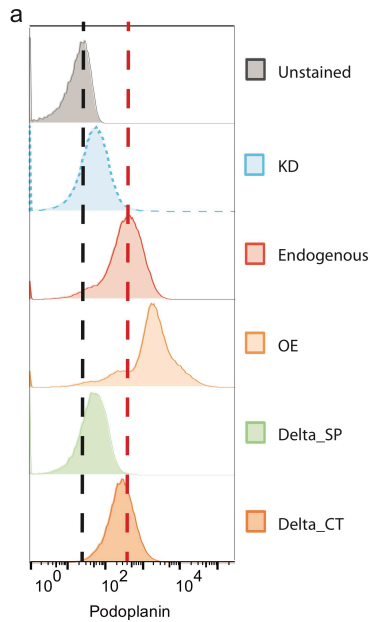

**Supplementary Figure S3:** a) Flow cytometry histograms illustrating surface podoplanin expression by the different podoplanin variant cell lines. Red dashed line indicates mean podoplanin levels in endogenous cells; Black line shows unstained control.
